# Supplementary material
Source: Springer Nature journal article supplement (https://www.springermedizin.de/resource/supplementary/12936_2011_2076_MOESM1_ESM.pdf/9543380)

**A**

|              | 306 | 308 | 310 | 333 | 344 | 371 | 375 | 384 | 385 | 386 | 390 | 391 | 417 | 419 | 424 | 437 | 455 | 473 | 475 | 477 | 486 | 490 | 503 | 528 | 533 | 541 | 545 | Total |
|--------------|-----|-----|-----|-----|-----|-----|-----|-----|-----|-----|-----|-----|-----|-----|-----|-----|-----|-----|-----|-----|-----|-----|-----|-----|-----|-----|-----|-------|
| Sal I        | F   | R   | I   | L   | F   | K   | N   | D   | E   | K   | R   | R   | N   | I   | L   | W   | K   | K   | P   | C   | Q   | R   | I   | D   | V   | K   | A   |       |
| Haplotype 1  | F   | R   | I   | L   | F   | K   | N   | D   | E   | K   | R   | R   | N   | I   | L   | W   | K   | K   | P   | C   | Q   | R   | I   | D   | V   | K   | A   | 2     |
| Haplotype 2  | F   | R   | I   | L   | F   | K   | N   | G   | E   | K   | H   | R   | N   | I   | L   | W   | K   | K   | P   | C   | E   | K   | I   | D   | V   | K   | A   | 3     |
| Haplotype 3  | F   | R   | I   | L   | F   | K   | N   | G   | E   | K   | H   | R   | N   | I   | I   | W   | K   | K   | P   | C   | Q   | R   | K   | D   | M   | K   | A   | 16    |
| Haplotype 4  | L   | S   | I   | L   | F   | K   | N   | G   | E   | K   | H   | R   | N   | M   | L   | R   | K   | K   | P   | C   | Q   | R   | K   | D   | V   | K   | A   | 4     |
| Haplotype 5  | F   | R   | I   | L   | F   | E   | N   | G   | E   | K   | R   | H   | N   | I   | I   | R   | K   | K   | P   | C   | Q   | R   | K   | D   | V   | K   | A   | 2     |
| Haplotype 6  | F   | R   | I   | F   | F   | K   | N   | D   | E   | K   | R   | R   | N   | I   | I   | R   | K   | K   | A   | C   | Q   | R   | K   | D   | V   | K   | A   | 6     |
| Haplotype 7  | F   | S   | I   | F   | F   | K   | D   | G   | K   | N   | H   | R   | K   | I   | I   | R   | K   | R   | P   | C   | Q   | R   | K   | D   | V   | K   | A   | 6     |
| Haplotype 8  | F   | S   | L   | F   | F   | K   | D   | G   | K   | N   | H   | R   | K   | I   | I   | R   | K   | K   | P   | C   | Q   | R   | K   | D   | V   | K   | A   | 2     |
| Haplotype 9  | F   | R   | I   | F   | F   | K   | N   | G   | K   | N   | H   | R   | K   | I   | I   | R   | K   | R   | P   | C   | Q   | R   | K   | D   | V   | K   | A   | 3     |
| Haplotype 10 | F   | R   | I   | F   | F   | E   | N   | G   | K   | N   | R   | R   | K   | I   | I   | R   | K   | K   | P   | C   | Q   | R   | I   | D   | V   | K   | V   | 2     |
| Haplotype 11 | F   | R   | I   | F   | S   | E   | N   | G   | K   | N   | R   | R   | K   | I   | I   | R   | K   | K   | P   | C   | Q   | R   | I   | D   | V   | K   | A   | 5     |
| Haplotype 12 | F   | R   | I   | F   | F   | E   | N   | G   | E   | Q   | R   | R   | K   | I   | I   | R   | I   | K   | P   | G   | Q   | R   | K   | G   | V   | T   | A   | 3     |

**B**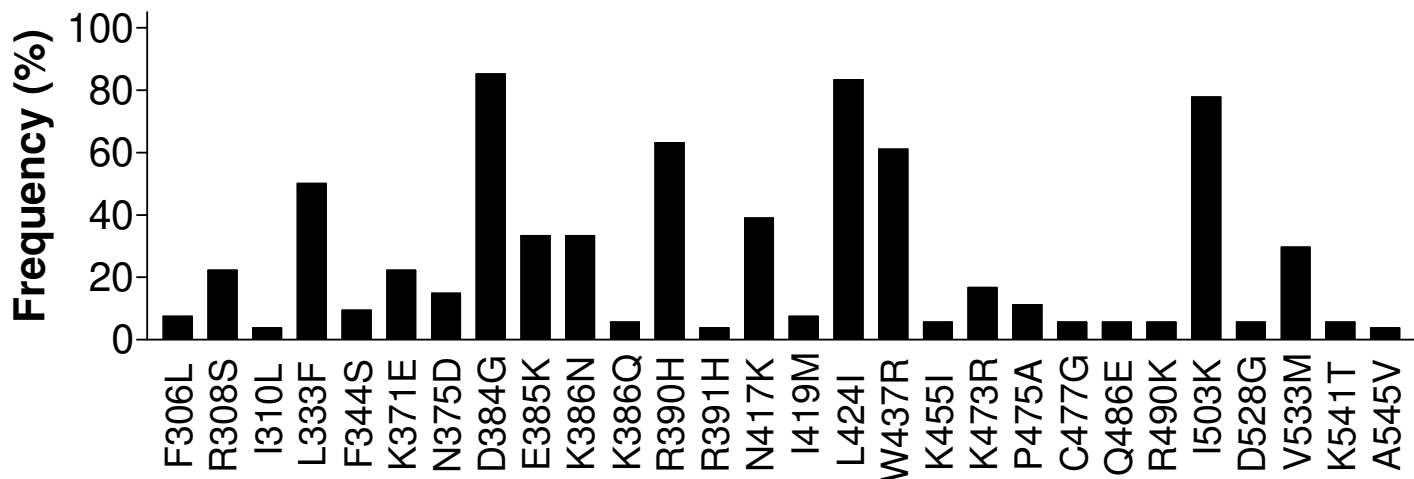

Supplement: MOESM1 [file 9543380]
